# Supplementary material for: A case–control study of mesothelioma in Minnesota iron ore (taconite) miners
Source: HighWire-hosted journal article supplement (doi:10.1136/oemed-2015-103105), 2015-12-10

Supplement 2. Scatter plot of amphibole EMP concentrations for each SEG in mines A-F (the horizontal line indicates the NIOSH REL<sup>1</sup> for EMP = 0.1 particles/cm<sup>3</sup>. Mine A in eastern zone. Mines B-F in western zone.

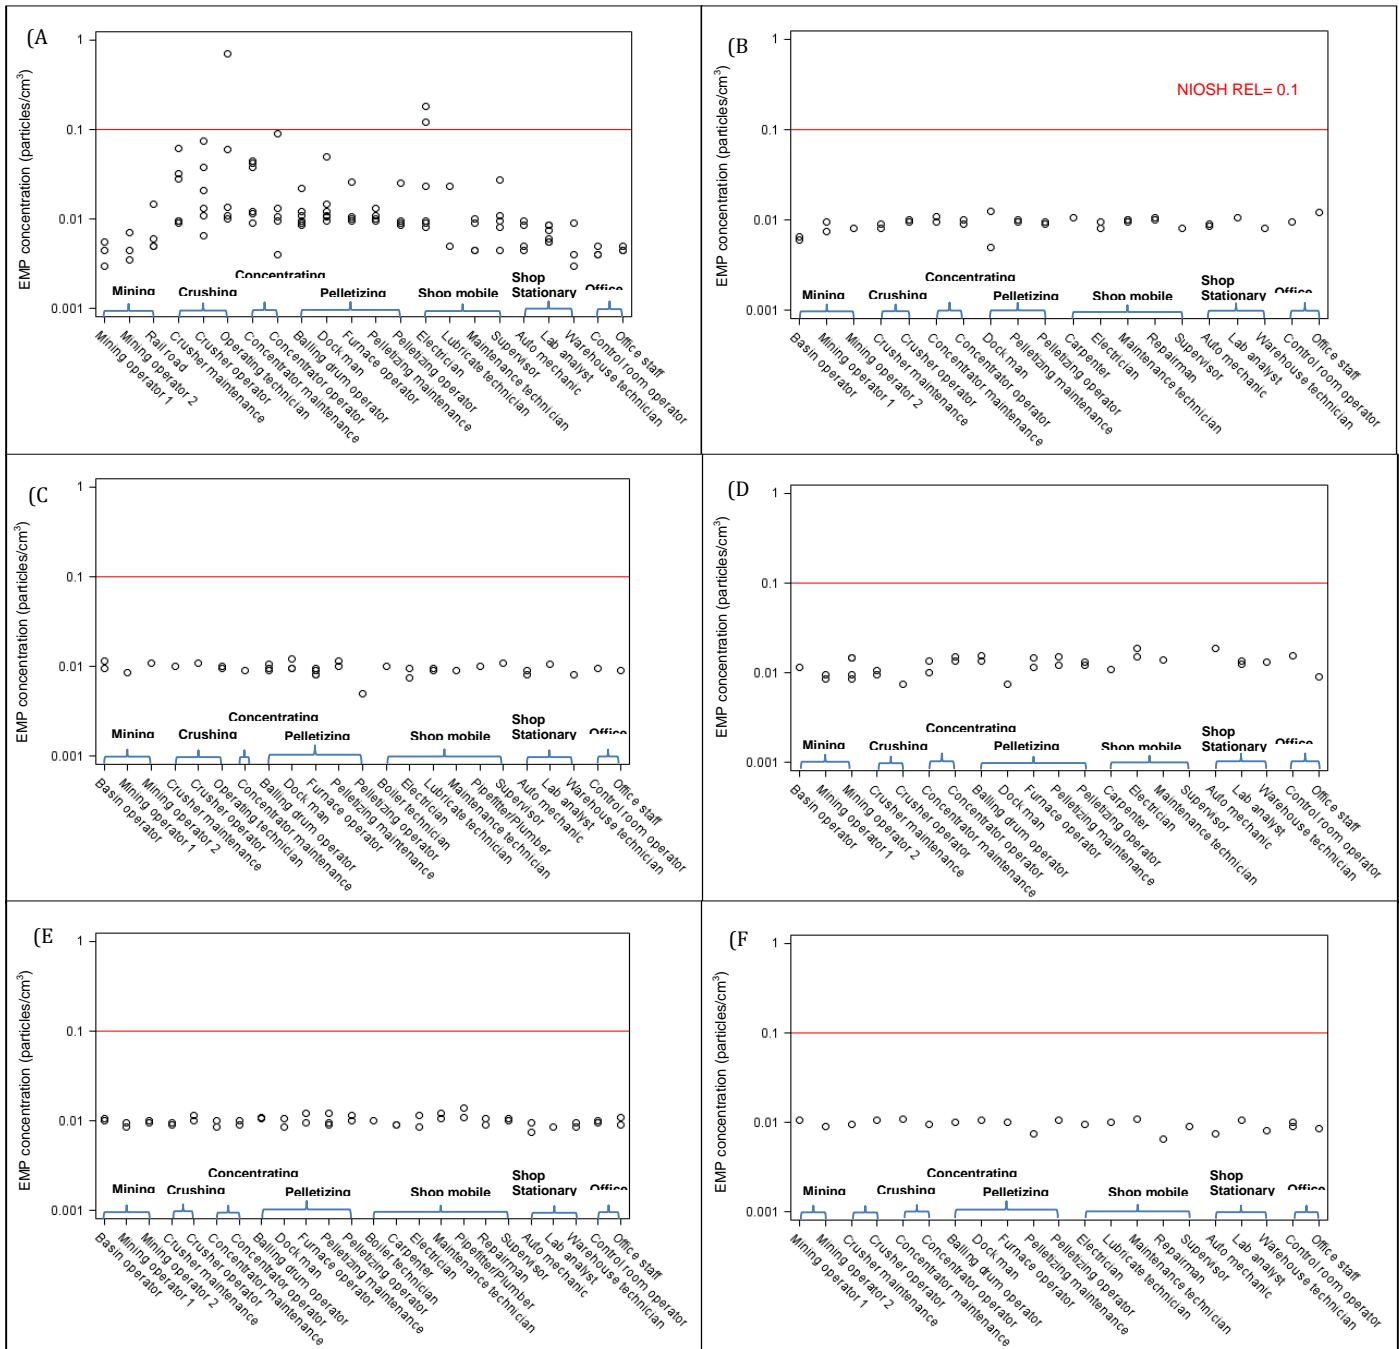

Supplement: oemed-2015-103105supp.pdf [file oemed-2015-103105supp.pdf]
